# Supplementary material for: SUANPAN: Scalable Photonic Linear Vector Machine
Source: Research Square preprint supplement (doi:10.21203/rs.3.rs-5839124/v1), 2025-02-11
Supplement: Supplementary file 1 [file c0a2e0dc14fa041e2e5765b1.docx]

**Supplementary information for:**

**SUANPAN: Scalable Photonic Linear Vector Machine**

Ziyue Yang1,5, Chen Li1,5, Yuqia Ran2, Yongzhuo Li1✉, Xue Feng1✉, Kaiyu Cui1, Fang Liu1, Hao Sun1, Wei Zhang1, Yu Ye2, Fei Qiao1, Jiaxing Wang3, Cun-Zheng Ning1,4, Connie J.Chang-Hasnain3, Yidong Huang1✉

1Department of Electronic Engineering, Tsinghua University, 100084 Beijing, China.

2State Key Laboratory for Mesoscopic Physics and Frontiers Science Center for Nano-Optoelectronics, School of Physics, Peking University, 100871 Beijing, China.

3Berxel Photonics Company Ltd., 518071 Shenzhen, China.

4College of Integrated Circuits and Optoelectronic Chips, Shenzhen Technology University, 518118 Shenzhen, China.

5These authors contributed equally: Ziyue Yang, Chen Li.

✉e-mail: [liyongzhuo@tsinghua.edu.cn](mailto:liyongzhuo@tsinghua.edu.cn); [x-feng@tsinghua.edu.cn](mailto:x-feng@tsinghua.edu.cn); [yidonghuang@tsinghua.edu.cn](mailto:yidonghuang@tsinghua.edu.cn)

**Supplementary Note 1:**

**The mechanism to perform signed vector inner product**

As shown in Extended Data Fig.1, *N* sets of 2×*M* BEADs should be employed to perform signed vector inner product *A*·*B*. The XOR operation of the sign bits of each multiplier *ai* and *bi* needs to be calculated in advance, which only takes a short amount of time to complete on traditional microelectronic processor. The on-off states of these 2×*M* BEADs in the *i*th set will be decided by the result of the XOR operation. If the result is zero, which means multiplier *ai* and *bi* have the same sign, then the *M* BEADs with positive bias voltage will be used to calculate the multiplication of multiplier *ai* and *bi* as mentioned above, and the other *M* BEADs with negative bias voltage will be at off state, and vice versa.

**Supplementary Note 2:**

**The fidelity of random vector inner product**

As stated in the main text, 1000 rounds of signed vector inner products for each bit precision (2-bit, 4-bit and 8-bit) are randomly generated and performed by SUANPAN. The calculation accuracy is evaluated by the fidelity expressed as:

Here, 1000 true values calculated by computer are denoted as a vector *x*, and the answers calculated by SUANPAN are denoted as a vector *y*. The fidelity describes the parallel degree between *x* and *y*, while the scaling error can be excluded. The normalized experimental results ( and ) for 2-bit, 4-bit and 8-bit are shown in the main text Fig.3d-f, respectively. It can be seen that the answers calculated by SUANPAN are highly consistent with those calculated by computer, and all of those fidelities for 2-bit, 4-bit and 8-bit precisions are higher than 98%.

**Supplementary Note 3:**

**Ising machine performed on SUANPAN**

Ising problem is a typical combinatorial optimization problem and also known as quadratic unconstrained binary optimization (QUBO) problem. An *N*-dimensional Ising problem can be defined by an interaction matrix *J*, which is a symmetric matrix of *N*×*N* dimensionality with diagonal elements of zero. For a given interaction matrix *J*, the Hamiltonian of Ising problem is defined as follows:

Solving Ising problem is to find the specific vector *S* that minimizes the Hamiltonian, which is denoted as the ground state. Since the element in *S* can only take 0 or 1, the dimensionality of the solution space is 2*N* for an *N*-dimensional Ising problem. In order to solve Ising problem efficiently, various heuristic algorithms have been developed and so-called Ising machine have been demonstrated on various computing platforms. Among them, the simulated annealing (SA) algorithm1 is combined with optical computing platforms to form a photonic Ising machine. Actually, annealing denotes a physical process in condensed matter physics, where the solid is heated up and then cooling to let all particles arrange themselves in the lowest energy ground state. Inspired by that, the SA algorithm is utilized to search for the ground state of Ising problem as follows1:

begin

initialize *S*, *T*

repeat

random *i*, *Si=*1-*Si*

calculated Δ*H*

if Δ*H* ≤ 0 then accept

else if exp(-Δ*H*/*T*) > random [0,1) then accept

annealing *T*=*T*×annealing rate

until stop criterion

end

The solution process of SA algorithm consists of initialization and *n* iterations as shown above. In each iteration, one random element of *S* is flipped (from 0 to 1 or from 1 to 0) and then the variation of Hamiltonian Δ*H* is calculated. After that, the vector of *S* would be accepted or not according to Δ*H*. Obviously, the Hamiltonian should be calculated in each iteration with O(*N*2) computation complexity, which is actually the main computational burden in SA algorithm. While, since *J* is a symmetric matrix and only one element in *S* is flipped, the variation of Hamiltonian Δ*H* can be transformed into an *N*-dimensional vector inner product as follows:

Considering *Si* is flipped from 0 to 1, then the Δ*H* is the inner product of the *i*th column of matrix *J* and vector *S*. Otherwise, if *Si* is flipped from 1 to 0, then negative sign should be taken. Therefore, such vector inner product can be readily performed on SUANPAN, while other nonlinear operations are performed on an electronic processor. Since the element in *S* can only take 0 or 1, the bit precision of *b* in SUANPAN is 1-bit quantization. Therefore, the configuration of SUANPAN is 32 sets with 2 BEADs in each set. For 30-dimensional Ising problem stated in the main text, SUANPAN can perform the 30-dimensional vector inner product at one time. While for the 1024-dimensional, the required 1024-dimensional vector inner product is decomposed into 32-dimensional one with time-division multiplexing for 32 times. The experimental parameters of initial *T*, annealing rate and iterations are shown in Extended Data Table1.

**Supplementary Note 4:**

**ANN performed on SUANPAN**

The model of the single-layer and double layer ANN performed in this work are shown in the main text Fig.4d and 4g, respectively. MNIST handwritten digit dataset is utilized as dataset, and stochastic gradient descent2 (SGD) is utilized as training method. The input data is a vector with 28×28 dimensionality, and then is downsampled to 14×14 dimensionality in the downsampling layer. Next, for single-layer ANN such data goes through one fully connected layer, and the nonlinear activation function is Softmax function. While for double-layer ANN, such data goes through two fully connected layer, and the nonlinear activation functions of hidden layer and output layer are Relu function and Softmax function, respectively. Actually, the fully connected layer can be considered as a vector matrix multiplication of the data vector and the weight matrix, which can be decomposed into vector inner products and performed on SUANPAN. While, other nonlinear activation functions are calculated on an electronic processor. In order to determine the bit precision of weight, the classification accuracies of single-layer ANN and double-layer ANN with different bit precision of weight are shown in Extended Data Fig.9a-b, respectively. Here, linear symmetric quantization is employed. Specifically, if the maximum and minimum value in the weight matrix is *x*1 and *x*2, respectively, then the quantization step-size for *M*-bit would be

where |*x*| means the absolute value of *x*. Obviously, the high classification accuracy would be achieved by high bit precision, while it also requires high computing power. In this work, 4-bit and 6-bit precision are employed in the single-layer and double-layer ANN, respectively. Therefore, the configuration of SUANPAN is 8/5 sets with 8/12 BEADs in each set for single-layer/double-layer ANN.

**Supplementary Note 5:**

**Performance and rectification of SUANPAN**

The output intensity of each VCSEL is shown in Extended Data Fig.3, where the output intensity is approximately linearly related to the duty cycle of the driving current. The *I-V* curve of each MoTe2 PD at dark condition is shown in Extended Data Fig.4, and the photocurrents of each MoTe2 PD at different light conditions are shown in Extended Data Fig.5. It can be seen that the photocurrent is approximately proportional to the duty ratio of the VCSEL driving current, which validates the encoding of *a* stated in the main text. The statistical uniformity of the VCSEL array and MoTe2 PD array are shown in Extended Data Fig.6. Even though our fabricated VCSELs and MoTe2 PDs show good uniformity and stability, the output intensity of each VCSEL and the output current of each PD may not be completely consistent under the same conditions due to the fabrication error. Therefore, it is necessary to rectify the entire architecture before performing calculation tasks. Firstly, the output dark current of each detector is adjusted to be consistent by changing the bias voltage on each detector. Secondly, under such bias voltage, the output photocurrent of each detector is adjusted to be consistent by changing the output intensity of each VCSEL. Then, it can be considered that all 64 BEADs are consistent.

1 Van Laarhoven, P. J. & Aarts, E. H. *Simulated annealing: theory and application*. (Springer, 1987).

2 Ketkar, N. *Deep learning with Python*. (Springer, 2017).
